# Supplementary material for: Artemisinin Attenuated Hydrogen Peroxide (H2O2)-Induced Oxidative Injury in SH-SY5Y and Hippocampal Neurons via the Activation of AMPK Pathway
Source: Int J Mol Sci. 2019 May 31;20(11):2680. doi: 10.3390/ijms20112680 (PMC6600327; doi:10.3390/ijms20112680)
Supplement: Supplementary file 1 [file ijms-20-02680-s001.pdf]

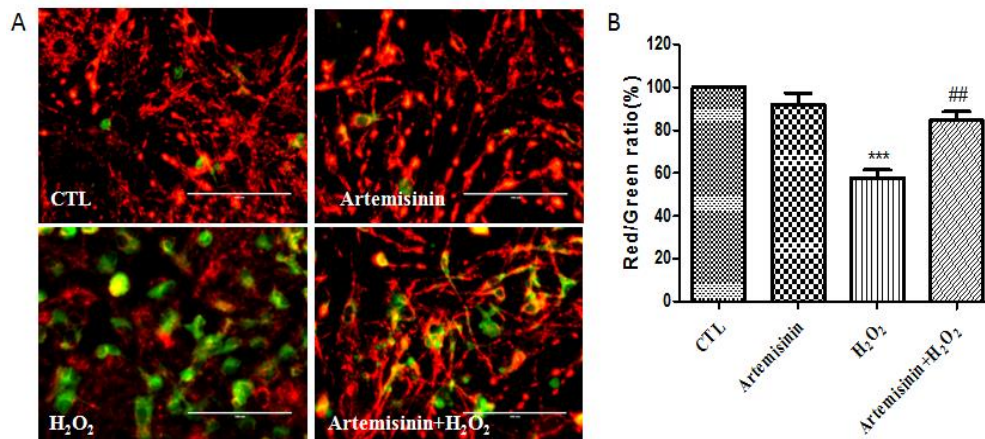

**Figure S1. Artemisinin attenuated H<sub>2</sub>O<sub>2</sub> -induced mitochondrial membrane potential ( $\Delta\psi_m$ ) loss in the hippocampal neurons.** (A) After pre-treatment with 25  $\mu$ M Artemisinin for 2 h, cells were incubated with or without 100  $\mu$ M H<sub>2</sub>O<sub>2</sub> for another 24 h,  $\Delta\psi_m$  was determined by the JC-1 assay. (B) Quantification of (A). The data was represented as the mean  $\pm$  SD. \*\*\*P < 0.001 versus control group; ##P < 0.01 versus H<sub>2</sub>O<sub>2</sub> -treated group were considered significantly different.

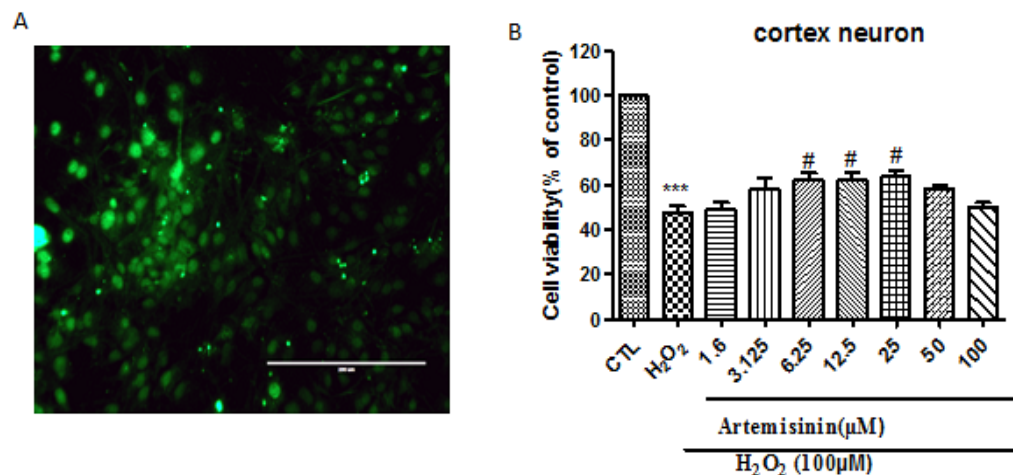

**Figure S2. Artemisinin attenuated the decrease in cell viability caused by H<sub>2</sub>O<sub>2</sub> in cortex neurons.** (A) Immunocytochemistry of NeuN. (B). Cells were pretreated with artemisinin at indicated concentrations and then induced with or without 100  $\mu$ M H<sub>2</sub>O<sub>2</sub> for a further 24h and cell viability was measured using the MTT assay. \*\*\*P < 0.001 versus control group; #P < 0.05 versus H<sub>2</sub>O<sub>2</sub> -treated group were considered significantly different.

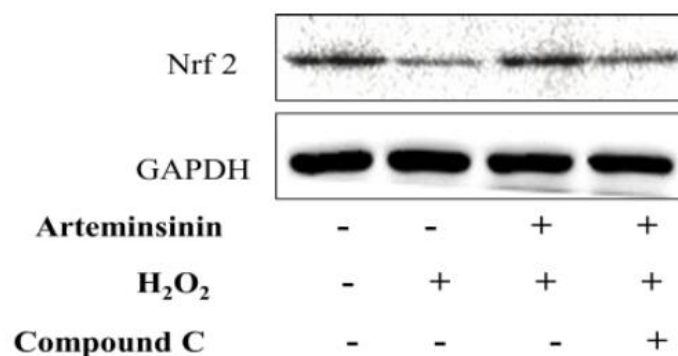

**Figure S3 Artemisinin s increased expression levels of Nrf2 in the SH-SY5Y cells.** Cells were pre-treated

with 5  $\mu\text{M}$  Compound C (AMPK inhibitor) for 30 min, and treated with 12.5  $\mu\text{M}$  artemisinin for 2 hours, then incubated with or without 600  $\mu\text{M}$   $\text{H}_2\text{O}_2$  for another 24 h, The expression of Nrf2 was measured by western blot.

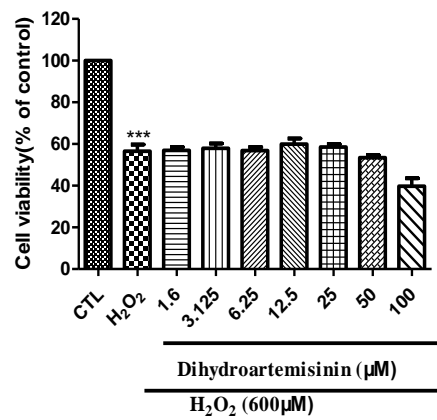

**Figure S4.** Dihydroartemisinin (DHA) had no significant protective effects under the same conditions as artemisinin. Cells were pretreated with artemisinin at indicated concentrations and then induced with or without 100  $\mu\text{M}$   $\text{H}_2\text{O}_2$  for a further 24h and cell viability was measured using the MTT assay. \*\*\* $P < 0.001$  versus control group.
